# Supplementary material for: Porous ZIF-8@polyacrylonitrile composite beads for iodine capture
Source: Royal Society of Chemistry journal article supplement (doi:10.1039/d1ra05223c), 2021-01-01
Supplement: d1ra05223c1.pdf [file d1ra05223c1.pdf]

## Porous ZIF-8@polyacrylonitrile Composite Beads for Iodine Capture

Qiang Yu <sup>a,\*</sup>, Xiaohui Jiang <sup>a,\*</sup>, Zhengjun Cheng <sup>a</sup>, Yunwen Liao <sup>a</sup>, Ming Duan <sup>b,\*</sup>

<sup>a</sup>Chemical Synthesis and Pollution Control Key Laboratory of Sichuan Province, China

West Normal University, Nanchong, Sichuan, PR China 637009.

<sup>b</sup>State Key Laboratory of Oil and Gas Reservoir Geology and Exploitation, Southwest

Petroleum University, Chengdu, Sichuan, PR China 610500.

\* Corresponding author Email: [jxh2314508@163.com](mailto:jxh2314508@163.com) (X. Jiang);  
[1924163238@qq.com](mailto:1924163238@qq.com) (Q. Yu); [mduan@126.com](mailto:mduan@126.com) (M. Duan).

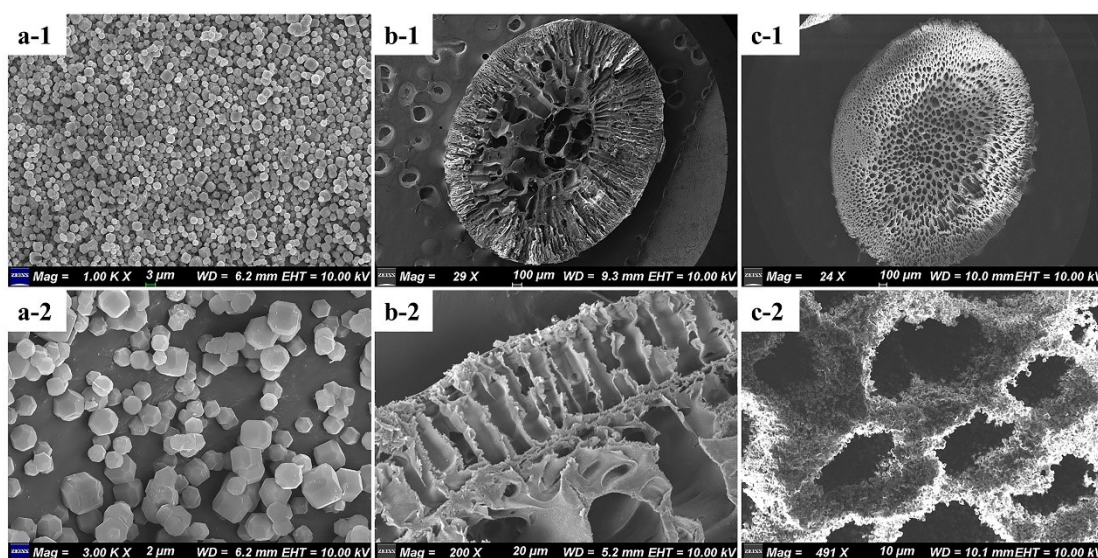

**Fig. S1.** Figure S1 SEM images of ZIF-8 (a1-a2), PAN (b1-b2), ZIF-8@PAN (c1-c2) at different magnifications.

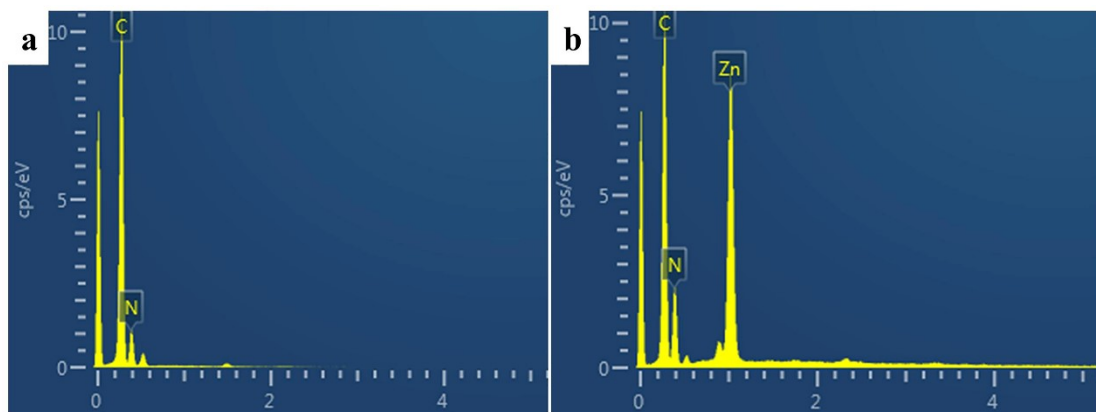

**Fig. S2.** (a) PAN and (b) EDS of ZIF-8.

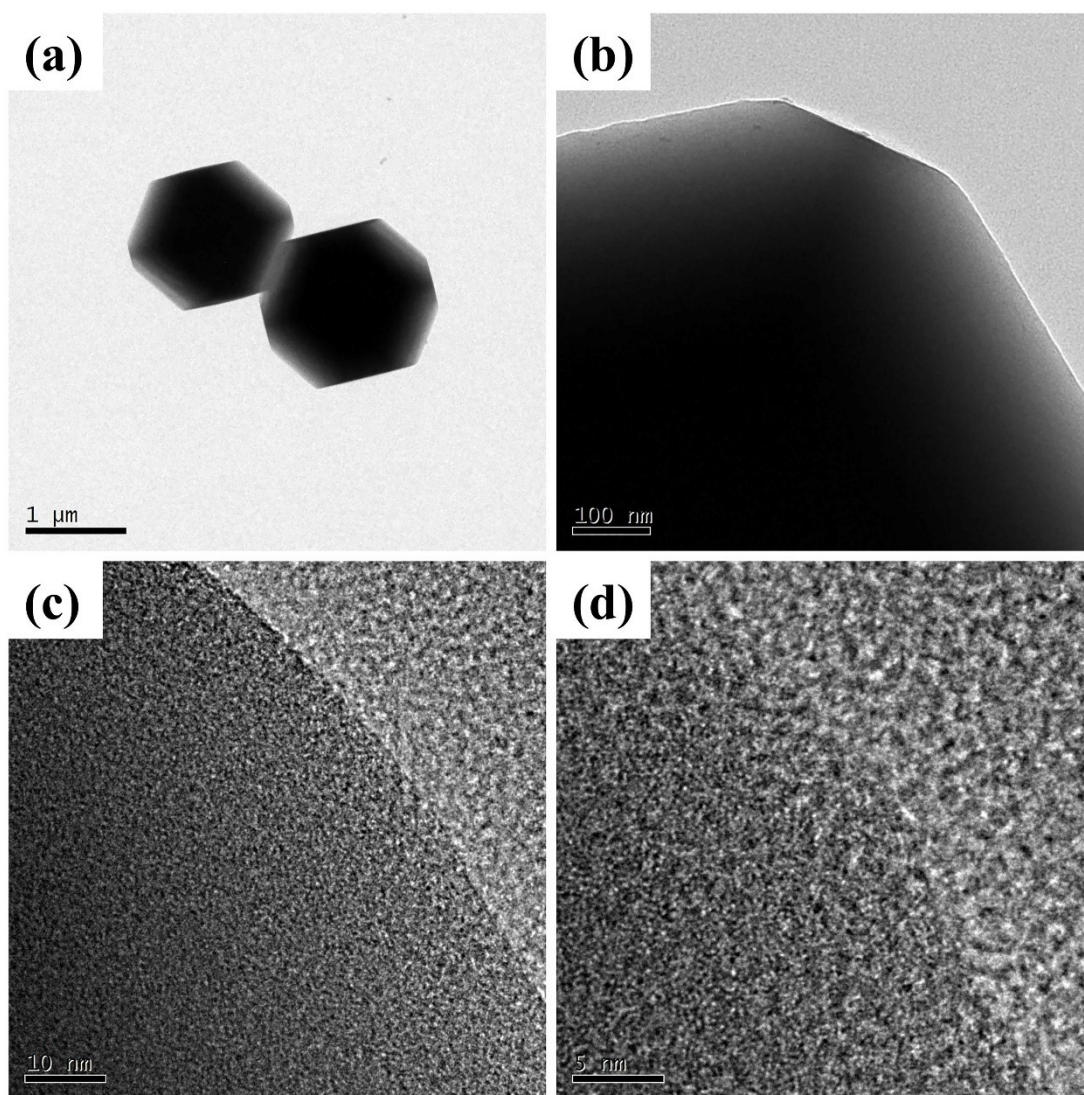

**Fig.S3.** HRTEM images of ZIF-8 samples at different magnifications.

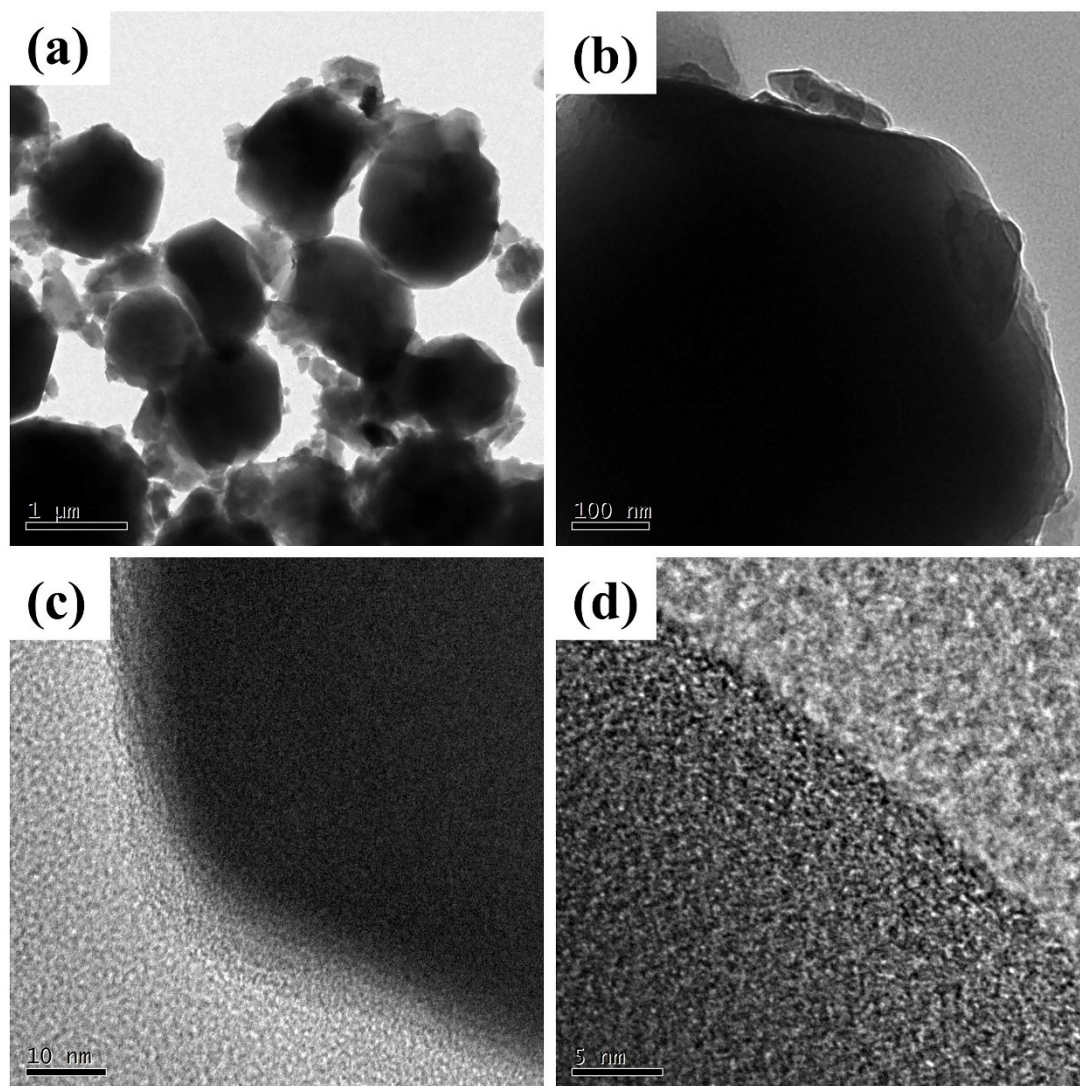

Fig.S4. HRTEM images of ZIF-8@PAN-2:1 samples at different magnifications.

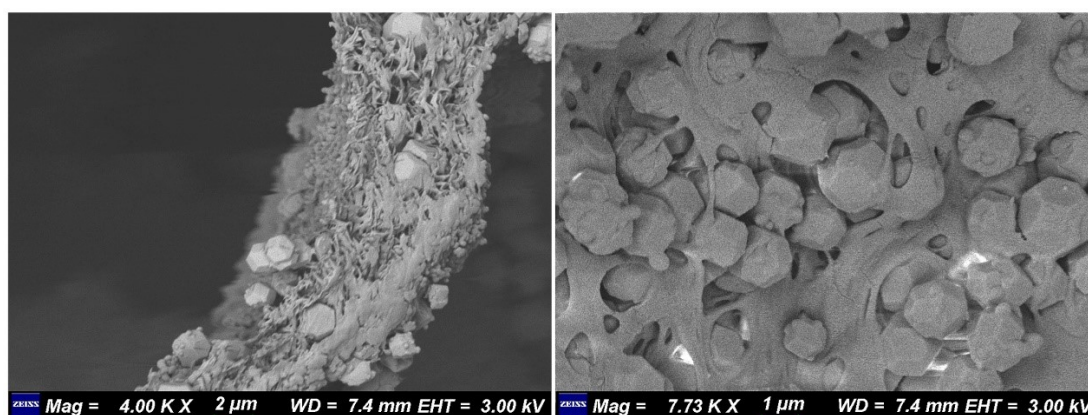

Fig. S5. PAN encapsulated ZIF -8.
